### 1. Number of ED beds

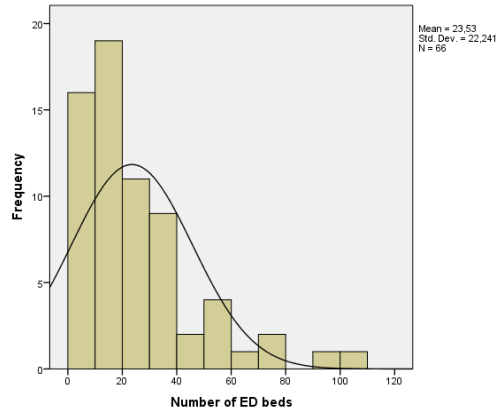

### 2. Number of hospital beds

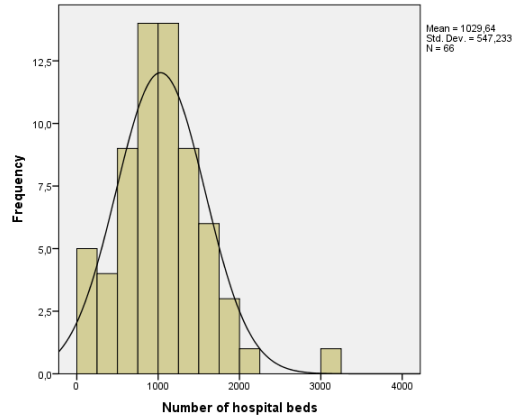

### 3. Number of ICU beds

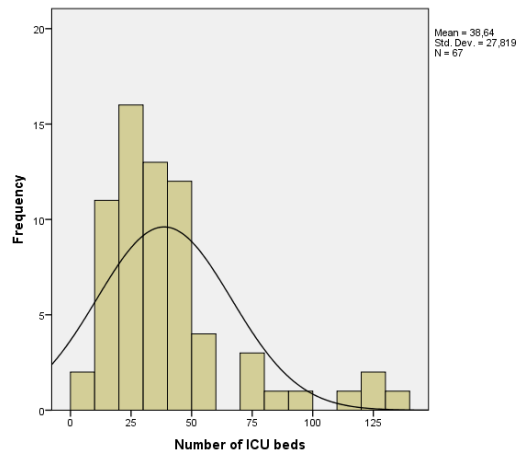

Source: https://storage.googleapis.com/plos-corpus-prod/10.1371/journal.pone.0161367/1/pone.0161367.s001.pdf
