# Supplementary material for: Variation in Structure and Process of Care in Traumatic Brain Injury: Provider Profiles of European Neurotrauma Centers Participating in the CENTER-TBI Study
Source: PubMed Central journal article supplement (PMC5003388; doi:10.1371/journal.pone.0161367), 2016-08-29
Supplement: pone.0161367.s005.pdf [file pone.0161367.s005.pdf]

| Characteristic                                                                         | Middle and high income countries (n = 58) | Low income countries (n =13) | P-value <sup>A</sup> | North and West Europe (n = 46) | East and South Europe and Israel (n = 25) | P-value <sup>B</sup> |
|----------------------------------------------------------------------------------------|-------------------------------------------|------------------------------|----------------------|--------------------------------|-------------------------------------------|----------------------|
| Patients with moderate TBI (GCS 9-12) without CT abnormalities are admitted to the ICU |                                           |                              | .09*                 |                                |                                           | .11                  |
| - No or only in the presence of other risk factors                                     | 38 (68%)                                  | 12 (92%)                     |                      | 29 (66%)                       | 21 (82%)                                  |                      |
| - General policy                                                                       | 18 (32%)                                  | 1 (8%)                       |                      | 15 (34%)                       | 4 (16%)                                   |                      |
| Patients with moderate TBI (GCS 9-12) with CT abnormalities are admitted to the ICU    |                                           |                              | .05*                 |                                |                                           | .13                  |
| - No or only in the presence of other risk factors                                     | 17 (30%)                                  | 8 (62%)                      |                      | 13 (30%)                       | 12 (48%)                                  |                      |
| - General policy                                                                       | 39 (70%)                                  | 5 (38%)                      |                      | 31 (70%)                       | 13 (52%)                                  |                      |
| Patients with mild TBI (GCS 13-15) using anti-coagulant therapy                        |                                           |                              | .27*                 |                                |                                           | .29                  |
| - No or only in the presence of other risk factors                                     | 41 (73%)                                  | 12 (92%)                     |                      | 32 (73%)                       | 21 (84%)                                  |                      |
| - General policy                                                                       | 15 (27%)                                  | 1 (8%)                       |                      | 12 (27%)                       | 4 (16%)                                   |                      |
| ICP monitoring is performed in patients with GCS<9 without CT abnormalities            |                                           |                              | .43*                 |                                |                                           | .05                  |
| - No or only in the presence of other risk factors                                     | 42 (75%)                                  | 10 (91%)                     |                      | 31 (70%)                       | 21 (91%)                                  |                      |
| - General policy                                                                       | 14 (25%)                                  | 1 (9%)                       |                      | 12 (30%)                       | 2 (9%)                                    |                      |
| ICP monitoring is performed in patients                                                |                                           |                              | .30*                 |                                |                                           | .12                  |

---

|                                                                                                   |                                                  |          |         |     |          |          |     |
|---------------------------------------------------------------------------------------------------|--------------------------------------------------|----------|---------|-----|----------|----------|-----|
| with intraventricular hemorrhages                                                                 |                                                  |          |         |     |          |          |     |
| -                                                                                                 | No or only in the presence of other risk factors | 40 (71%) | 6 (55%) |     | 33 (75%) | 13 (56%) |     |
| -                                                                                                 | General policy                                   | 16 (29%) | 5 (45%) |     | 11 (25%) | 10 (44%) |     |
| ICP sensors that are used at the ICU:                                                             |                                                  |          |         | -   |          | -        |     |
| -                                                                                                 | Parenchymal                                      | 20 (36%) | 1 (9%)  |     | 14 (32%) | 7 (31%)  |     |
| -                                                                                                 | Ventricular                                      | 3 (5%)   | 3 (27%) |     | 2 (4%)   | 4 (17%)  |     |
| -                                                                                                 | Both                                             | 33 (59%) | 7 (64%) |     | 28 (64%) | 12 (52%) |     |
| Threshold for decompressive craniotomy in elevated ICP                                            |                                                  |          |         | -   |          | -        |     |
| -                                                                                                 | >20mmHg                                          | 6 (12%)  | 1 (10%) |     | 6 (16%)  | 1 (4%)   |     |
| -                                                                                                 | >25mmHg                                          | 28 (55%) | 7 (70%) |     | 23 (61%) | 12 (52%) |     |
| -                                                                                                 | >30mmHg                                          | 17 (33%) | 2 (20%) |     | 9 (24%)  | 10 (44%) |     |
| Structural variation between (neuro)surgeons with regard to their decision to place an ICP sensor |                                                  | 25 (45%) | 8 (62%) | .27 | 23 (52%) | 10 (40%) | .33 |

---
